# Supplementary material for: Secondary Structure Characterization of Glucagon Products by Circular Dichroism and Nuclear Magnetic Resonance Spectroscopy
Source: MDPI journal article supplement (doi:10.3390/molecules27227805), 2022-11-12
Supplement: s1 [file s1]

## Supplementary Information

# Secondary Structure Characterization of Glucagon Products by Circular Dichroism and Nuclear Magnetic Resonance Spectroscopy

Zhongli Bao, Ya-Chi Cheng, Justin Jun Wei, Mary Ziping Luo, and Jack Yongfeng Zhang\*

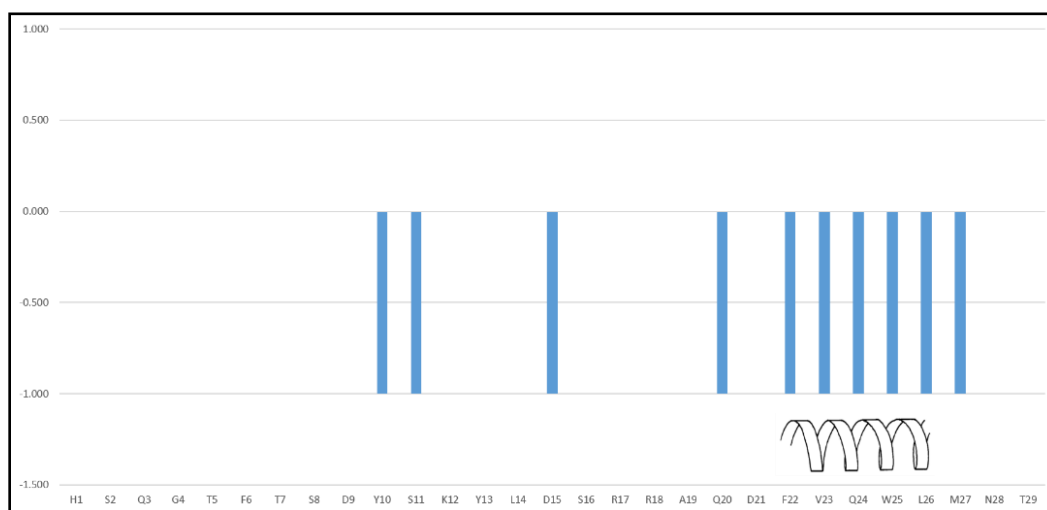

Figure S1. The Chemical shift index analysis of ELI-Glucagon

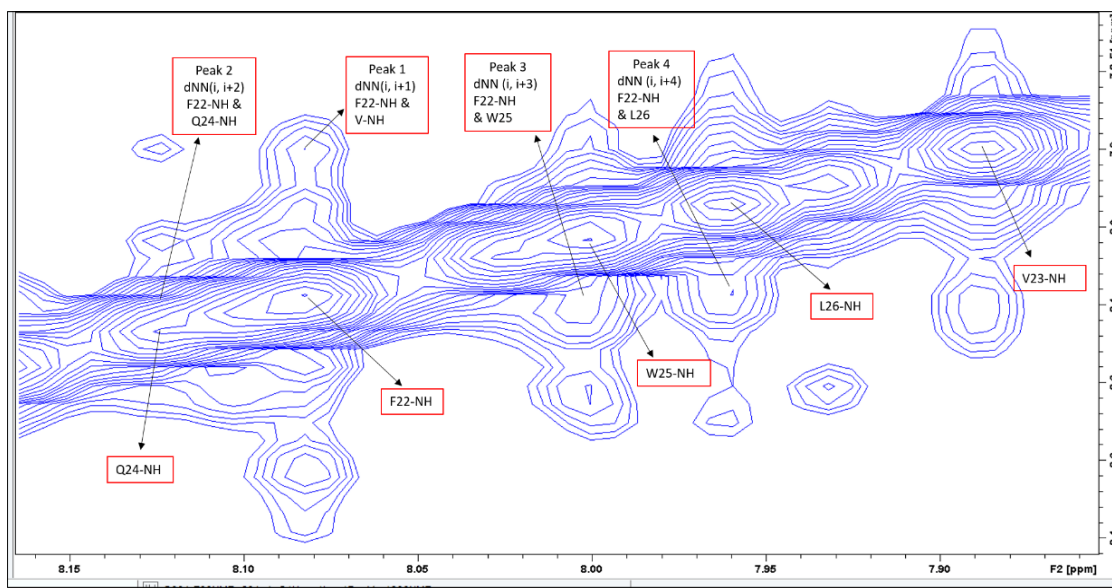

Figure S2. F22 amide proton connectivity [dNN( $i, i+1$ ), ( $i, i+2$ ), ( $i, i+3$ ), ( $i, i+4$ )] (ELI-Glucagon)

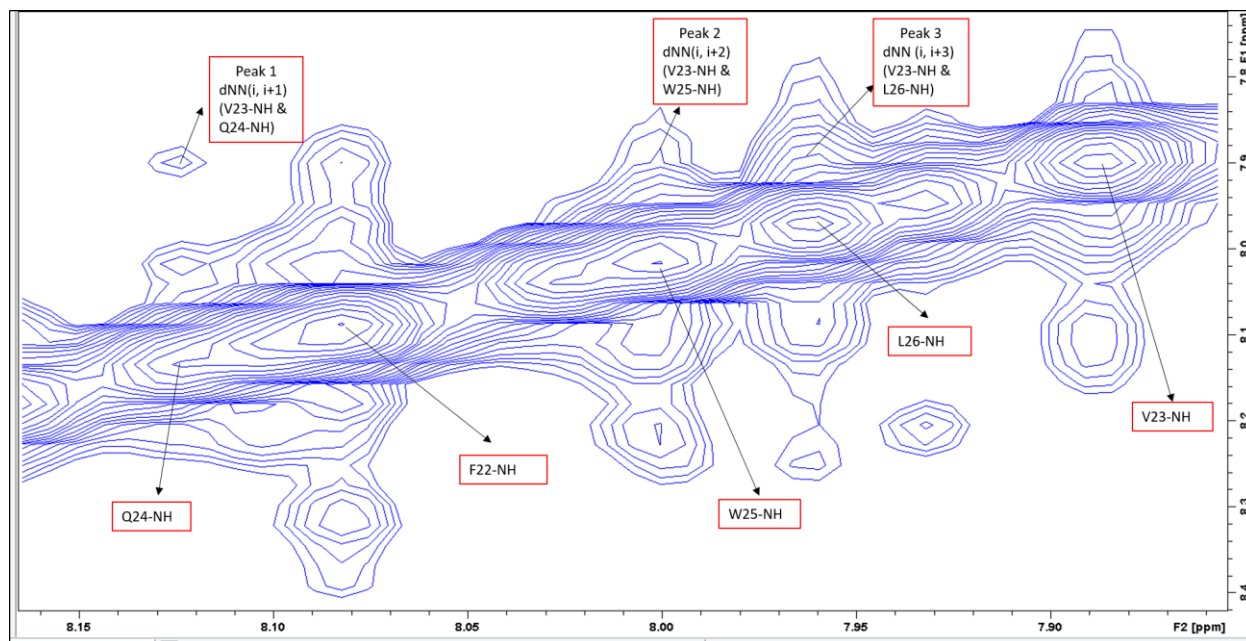

Figure S3. V23 amide proton connectivity [dNN( $i, i+1$ ), ( $i, i+2$ ), ( $i, i+3$ ), ( $i, i+4$ )] (ELI-Glucagon)

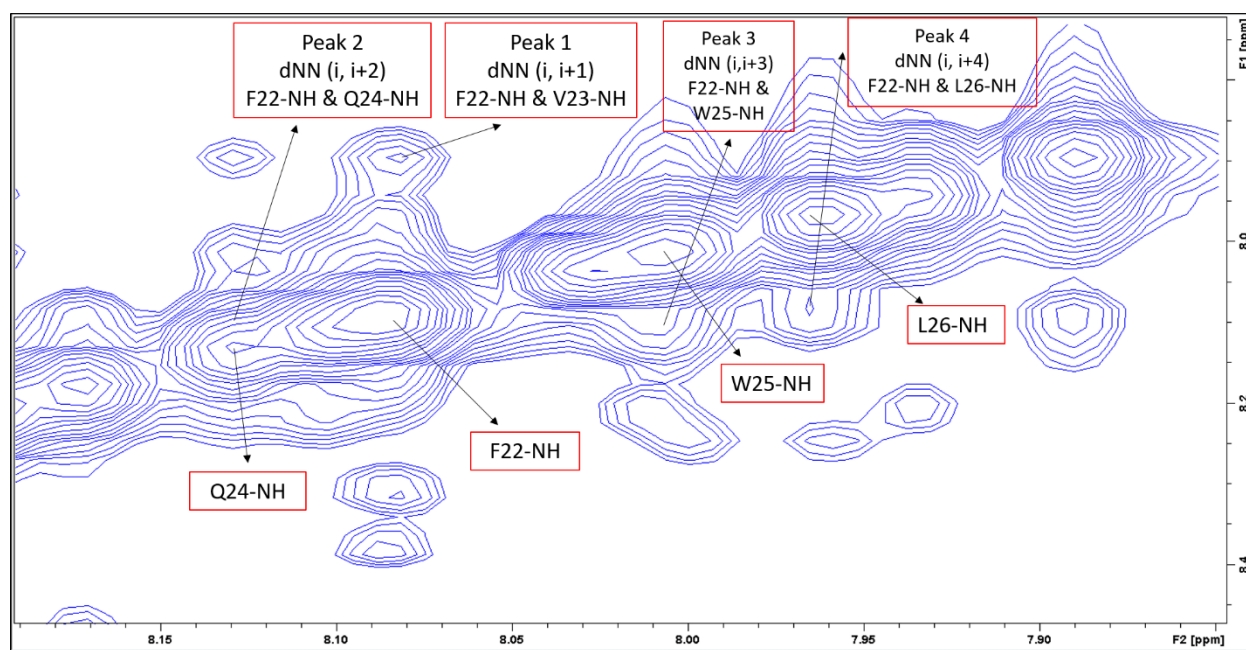

Figure S4. F22 amide proton connectivity [dNN( $i, i+1$ ), ( $i, i+2$ ), ( $i, i+3$ ), ( $i, i+4$ )] (AMP-Glucagon)

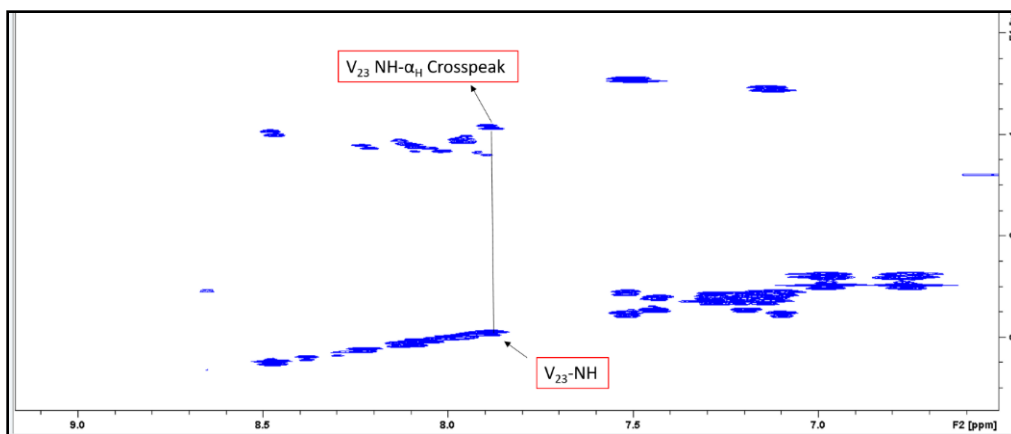

Figure S5. COSY image of glucagon (NH- $\alpha$ H Region)

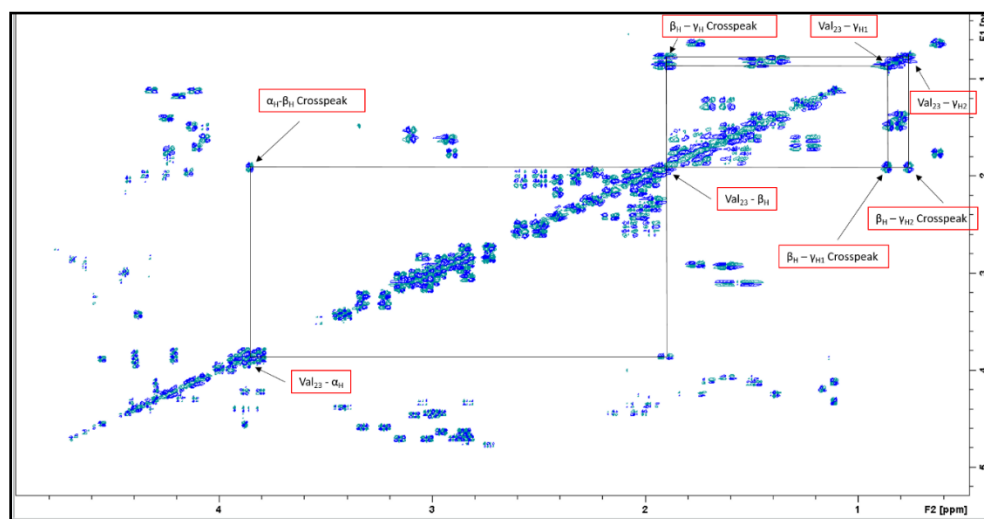

Figure S6. COSY image of glucagon ( $\alpha$ H- $\beta$ H- $\gamma$ H Region)

Table S1. <sup>1</sup>H Chemical Shift Assignment (PPM) of ELI-Glucagon using 2D NMR Methods

| Residue             | NH (PPM)          | C <sup>α</sup> H (PPM) | C <sup>β</sup> H (PPM)  | Others (PPM)                                                                       |
|---------------------|-------------------|------------------------|-------------------------|------------------------------------------------------------------------------------|
| His 1               | n.o.*             | n.o.*                  | n.o.*                   |                                                                                    |
| Ser 2               | 8.86              | 4.55                   | 3.88                    |                                                                                    |
| Gln 3               | 8.75              | 4.42                   | 2.01, 2.15              | C <sup>γ</sup> H = 2.42                                                            |
| Gly 4               | 8.46              | 3.98                   |                         |                                                                                    |
| Thr 5               | 8.02              | 4.30                   | 4.11                    | C <sup>γ</sup> H = 1.10                                                            |
| Phe 6               | 8.37              | 4.70                   | 3.01, 3.15              |                                                                                    |
| Thr 7               | 8.08              | 4.29                   | 4.20                    | C <sup>γ</sup> H = 1.17                                                            |
| Ser 8               | 8.29              | 4.41                   | 3.91, 3.84              |                                                                                    |
| Asp 9               | 8.47              | 4.69                   | 2.86                    |                                                                                    |
| Tyr 10              | 8.16              | 4.44                   | 2.98                    |                                                                                    |
| Ser 11              | 8.08              | 4.23                   | 3.82, 3.87              |                                                                                    |
| Lys 12 <sup>a</sup> | 7.49 <sup>a</sup> | n.o.*                  | 1.61 <sup>a</sup>       | C <sup>γ</sup> H = 1.26; C <sup>δ</sup> H=1.62; C <sup>ε</sup> H=2.92 <sup>a</sup> |
| Tyr 13 <sup>a</sup> | 7.88 <sup>a</sup> | 4.36 <sup>a</sup>      | 2.84, 3.05 <sup>a</sup> |                                                                                    |
| Leu 14              | 7.93              | 4.08                   | 1.69                    | C <sup>γ</sup> H = 1.47; C <sup>δ</sup> H=0.82                                     |
| Asp 15              | 8.20              | 4.65                   | 2.85, 2.95              |                                                                                    |
| Ser 16              | 8.00              | 4.41                   | 3.87, 3.92              |                                                                                    |
| Arg 17 <sup>a</sup> | 7.12 <sup>a</sup> | 4.24 <sup>a</sup>      | 1.74, 1.82 <sup>a</sup> | C <sup>γ</sup> H = 1.58; C <sup>δ</sup> H=3.10 <sup>a</sup>                        |
| Arg 18 <sup>a</sup> | 8.10 <sup>a</sup> | 4.26 <sup>a</sup>      | 1.74, 1.82 <sup>a</sup> | C <sup>γ</sup> H = 1.58; C <sup>δ</sup> H=3.10 <sup>a</sup>                        |
| Ala 19 <sup>a</sup> | 8.21 <sup>a</sup> | 4.23 <sup>a</sup>      | 1.40 <sup>a</sup>       |                                                                                    |
| Gln 20              | 8.22              | 4.25                   | 1.95, 2.02              | C <sup>γ</sup> H = 2.32                                                            |
| Asp 21              | 8.31              | 4.68                   | 2.99                    |                                                                                    |
| Phe 22              | 8.08              | 4.45                   | 3.07, 2.99              |                                                                                    |
| Val 23              | 7.89              | 3.85                   | 1.89                    | C <sup>γ</sup> H = 0.84; 0.74                                                      |
| Gln 24              | 8.12              | 4.15                   | 1.94                    | C <sup>γ</sup> H = 2.24                                                            |
| Trp 25              | 8.00              | 4.58                   | 3.31, 3.21              |                                                                                    |
| Leu 26              | 7.96              | 4.10                   | 1.68                    | C <sup>γ</sup> H = 1.26; C <sup>δ</sup> H=0.81                                     |
| Met 27              | 8.00              | 4.35                   | 1.96, 2.06              | C <sup>γ</sup> H = 2.50; 2.58                                                      |
| Asn 28              | 8.24              | 4.75                   | 2.84, 2.75              |                                                                                    |
| Thr29               | 7.96              | 4.40                   | 4.11                    | C <sup>γ</sup> H = 1.10                                                            |

n.o.\* = not observed; <sup>a</sup> = ambiguously assigned

Table S2. <sup>1</sup>H Chemical Shift Assignment (PPM) of AMP-Glucagon using 2D NMR Methods

| Residue             | NH (PPM)          | C <sup>α</sup> H (PPM) | C <sup>β</sup> H (PPM)  | Others (PPM)                                                                       |
|---------------------|-------------------|------------------------|-------------------------|------------------------------------------------------------------------------------|
| His 1               | n.o.*             | n.o.*                  | n.o.*                   |                                                                                    |
| Ser 2               | 8.86              | 4.55                   | 3.88                    |                                                                                    |
| Gln 3               | 8.75              | 4.43                   | 2.01, 2.15              | C <sup>γ</sup> H = 2.42                                                            |
| Gly 4               | 8.46              | 3.98                   |                         |                                                                                    |
| Thr 5               | 8.02              | 4.31                   | 4.11                    | C <sup>γ</sup> H = 1.10                                                            |
| Phe 6               | 8.37              | 4.70                   | 3.01, 3.15              |                                                                                    |
| Thr 7               | 8.08              | 4.29                   | 4.20                    | C <sup>γ</sup> H = 1.17                                                            |
| Ser 8               | 8.29              | 4.41                   | 3.91, 3.84              |                                                                                    |
| Asp 9               | 8.47              | 4.69                   | 2.86                    |                                                                                    |
| Tyr 10              | 8.17              | 4.45                   | 2.98                    |                                                                                    |
| Ser 11              | 8.08              | 4.23                   | 3.82, 3.87              |                                                                                    |
| Lys 12 <sup>a</sup> | 7.49 <sup>a</sup> | n.o.*                  | 1.61 <sup>a</sup>       | C <sup>γ</sup> H = 1.26; C <sup>δ</sup> H=1.62; C <sup>ε</sup> H=2.92 <sup>a</sup> |
| Tyr 13 <sup>a</sup> | 7.88 <sup>a</sup> | 4.36 <sup>a</sup>      | 2.84, 3.05 <sup>a</sup> |                                                                                    |
| Leu 14              | 7.93              | 4.08                   | 1.69                    | C <sup>γ</sup> H = 1.47; C <sup>δ</sup> H=0.82                                     |
| Asp 15              | 8.20              | 4.65                   | 2.85, 2.95              |                                                                                    |
| Ser 16              | 8.00              | 4.41                   | 3.87, 3.92              |                                                                                    |
| Arg 17 <sup>a</sup> | 7.12 <sup>a</sup> | 4.24 <sup>a</sup>      | 1.74, 1.82 <sup>a</sup> | C <sup>γ</sup> H = 1.58; C <sup>δ</sup> H=3.10 <sup>a</sup>                        |
| Arg 18 <sup>a</sup> | 8.10 <sup>a</sup> | 4.26 <sup>a</sup>      | 1.74, 1.82 <sup>a</sup> | C <sup>γ</sup> H = 1.58; C <sup>δ</sup> H=3.10 <sup>a</sup>                        |
| Ala 19 <sup>a</sup> | 8.21 <sup>a</sup> | 4.23 <sup>a</sup>      | 1.40 <sup>a</sup>       |                                                                                    |
| Gln 20              | 8.22              | 4.25                   | 1.95, 2.02              | C <sup>γ</sup> H = 2.32                                                            |
| Asp 21              | 8.31              | 4.68                   | 2.99                    |                                                                                    |
| Phe 22              | 8.08              | 4.45                   | 3.07, 2.99              |                                                                                    |
| Val 23              | 7.89              | 3.85                   | 1.89                    | C <sup>γ</sup> H = 0.84; 0.74                                                      |
| Gln 24              | 8.12              | 4.15                   | 1.94                    | C <sup>γ</sup> H = 2.24                                                            |
| Trp 25              | 8.00              | 4.58                   | 3.31, 3.21              |                                                                                    |
| Leu 26              | 7.96              | 4.10                   | 1.68                    | C <sup>γ</sup> H = 1.26; C <sup>δ</sup> H=0.81                                     |
| Met 27              | 8.00              | 4.35                   | 1.96, 2.06              | C <sup>γ</sup> H = 2.50; 2.58                                                      |
| Asn 28              | 8.24              | 4.75                   | 2.84, 2.75              |                                                                                    |
| Thr29               | 7.96              | 4.40                   | 4.11                    | C <sup>γ</sup> H = 1.10                                                            |

n.o.\* = not observed because of exchange; <sup>a</sup> = ambiguously assigned

Table S3. The Chemical shift index analysis of ELI-Glucagon

| Residue | Real C <sup>α</sup> H (PPM) | Reference C <sup>α</sup> H (PPM) | $\Delta$ (Real C <sup>α</sup> H-Reference C <sup>α</sup> H) (PPM) | Index Value |
|---------|-----------------------------|----------------------------------|-------------------------------------------------------------------|-------------|
| S2      | 4.55                        | 4.50                             | 0.05                                                              | 0           |
| Q3      | 4.42                        | 4.37                             | 0.05                                                              | 0           |
| G4      | 3.98                        | 3.97                             | 0.01                                                              | 0           |
| T5      | 4.30                        | 4.35                             | -0.05                                                             | 0           |
| F6      | 4.70                        | 4.66                             | 0.04                                                              | 0           |
| T7      | 4.29                        | 4.35                             | -0.06                                                             | 0           |
| S8      | 4.41                        | 4.50                             | -0.09                                                             | 0           |
| D9      | 4.69                        | 4.76                             | -0.07                                                             | 0           |
| Y10     | 4.44                        | 4.60                             | -0.16                                                             | -1          |
| S11     | 4.23                        | 4.50                             | -0.27                                                             | -1          |
| L14     | 4.08                        | 4.17                             | -0.09                                                             | 0           |
| D15     | 4.65                        | 4.76                             | -0.11                                                             | -1          |
| S16     | 4.41                        | 4.50                             | -0.09                                                             | 0           |
| Q20     | 4.25                        | 4.37                             | -0.12                                                             | -1          |
| D21     | 4.68                        | 4.76                             | -0.08                                                             | 0           |
| F22     | 4.45                        | 4.66                             | -0.21                                                             | -1          |
| V23     | 3.85                        | 3.95                             | -0.10                                                             | -1          |
| Q24     | 4.15                        | 4.37                             | -0.22                                                             | -1          |
| W25     | 4.58                        | 4.70                             | -0.12                                                             | -1          |
| L26     | 4.10                        | 4.20                             | -0.10                                                             | -1          |
| M27     | 4.35                        | 4.52                             | -0.17                                                             | -1          |
| N28     | 4.75                        | 4.75                             | 0.00                                                              | 0           |
| T29     | 4.40                        | 4.35                             | 0.05                                                              | 0           |

Table S4. The Chemical shift index analysis of AMP-Glucagon

| Residue | Real C <sup>α</sup> H (PPM) | Reference C <sup>α</sup> H (PPM) | $\Delta$ (Real C <sup>α</sup> H-Reference C <sup>α</sup> H) (PPM) | Index Value |
|---------|-----------------------------|----------------------------------|-------------------------------------------------------------------|-------------|
| S2      | 4.55                        | 4.50                             | 0.05                                                              | 0           |
| Q3      | 4.43                        | 4.37                             | 0.06                                                              | 0           |
| G4      | 3.98                        | 3.97                             | 0.01                                                              | 0           |
| T5      | 4.31                        | 4.35                             | -0.04                                                             | 0           |
| F6      | 4.70                        | 4.66                             | 0.04                                                              | 0           |
| T7      | 4.29                        | 4.35                             | -0.06                                                             | 0           |
| S8      | 4.41                        | 4.50                             | -0.09                                                             | 0           |
| D9      | 4.69                        | 4.76                             | -0.07                                                             | 0           |
| Y10     | 4.45                        | 4.60                             | -0.15                                                             | -1          |
| S11     | 4.23                        | 4.50                             | -0.27                                                             | -1          |
| L14     | 4.08                        | 4.17                             | -0.09                                                             | 0           |
| D15     | 4.65                        | 4.76                             | -0.11                                                             | -1          |
| S16     | 4.41                        | 4.50                             | -0.09                                                             | 0           |
| Q20     | 4.25                        | 4.37                             | -0.12                                                             | -1          |
| D21     | 4.68                        | 4.76                             | -0.08                                                             | 0           |
| F22     | 4.45                        | 4.66                             | -0.21                                                             | -1          |
| V23     | 3.85                        | 3.95                             | -0.10                                                             | -1          |
| Q24     | 4.15                        | 4.37                             | -0.22                                                             | -1          |
| W25     | 4.58                        | 4.70                             | -0.12                                                             | -1          |
| L26     | 4.10                        | 4.20                             | -0.10                                                             | -1          |
| M27     | 4.35                        | 4.52                             | -0.17                                                             | -1          |
| N28     | 4.75                        | 4.75                             | 0.00                                                              | 0           |
| T29     | 4.40                        | 4.35                             | 0.05                                                              | 0           |
